# Supplementary material for: 1D lanthanide(iii) coordination polymers with disulfide ligand generated in situ
Source: Royal Society of Chemistry journal article supplement (doi:10.1039/b800437b), 2008-01-01
Supplement: b800437b.pdf [file b800437b.pdf]

## Electronic supplementary information

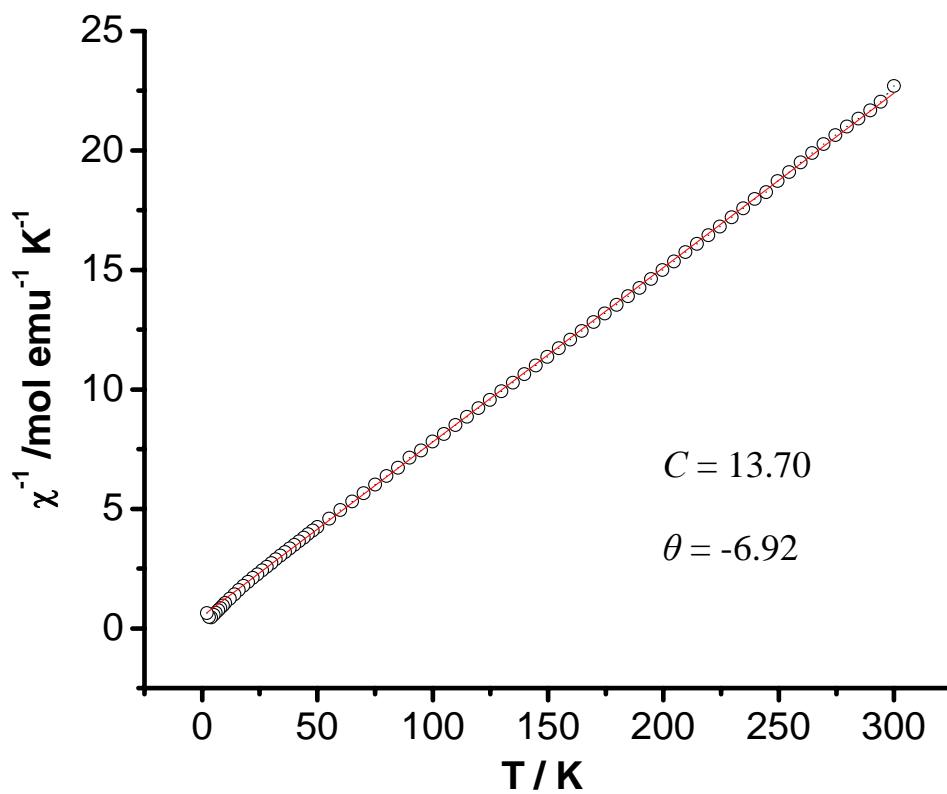

Fig. S1. Temperature dependence of the  $1/\chi_m$  product for complex **1**.

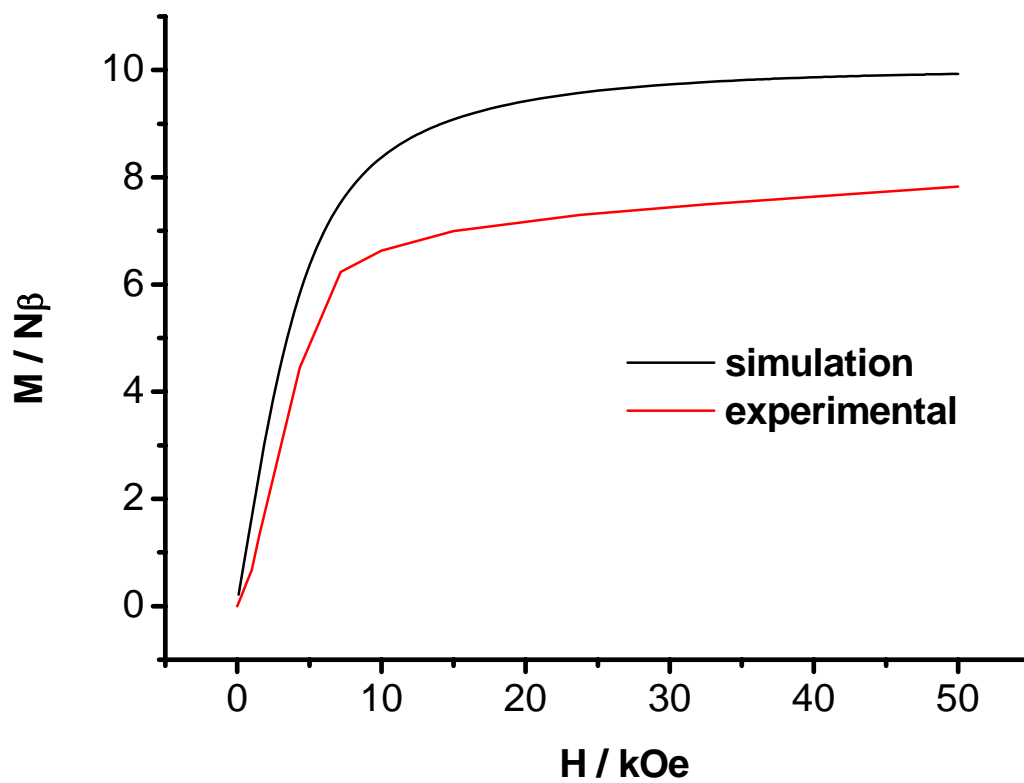

Fig. S2. Magnetic-field dependence of the molar magnetization of complex **1** at 2K. The simulated line is obtained from Brillouin functions with  $J = 15/2$  and  $g = 4/3$ .

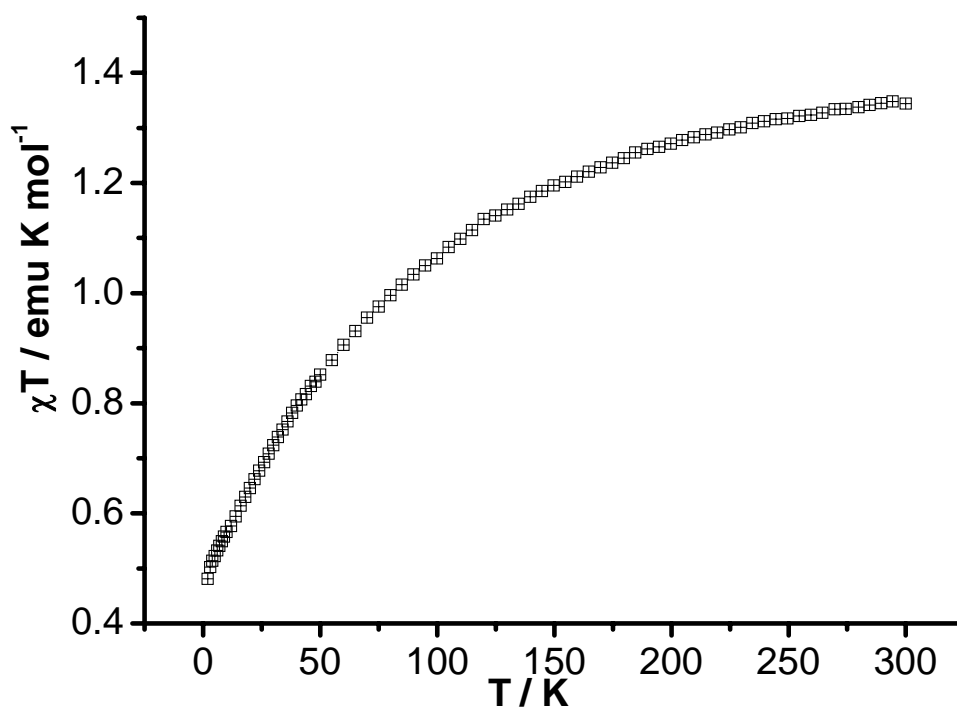

Fig. S3. Temperature dependence of the  $\chi_m T$  product for complex **2**

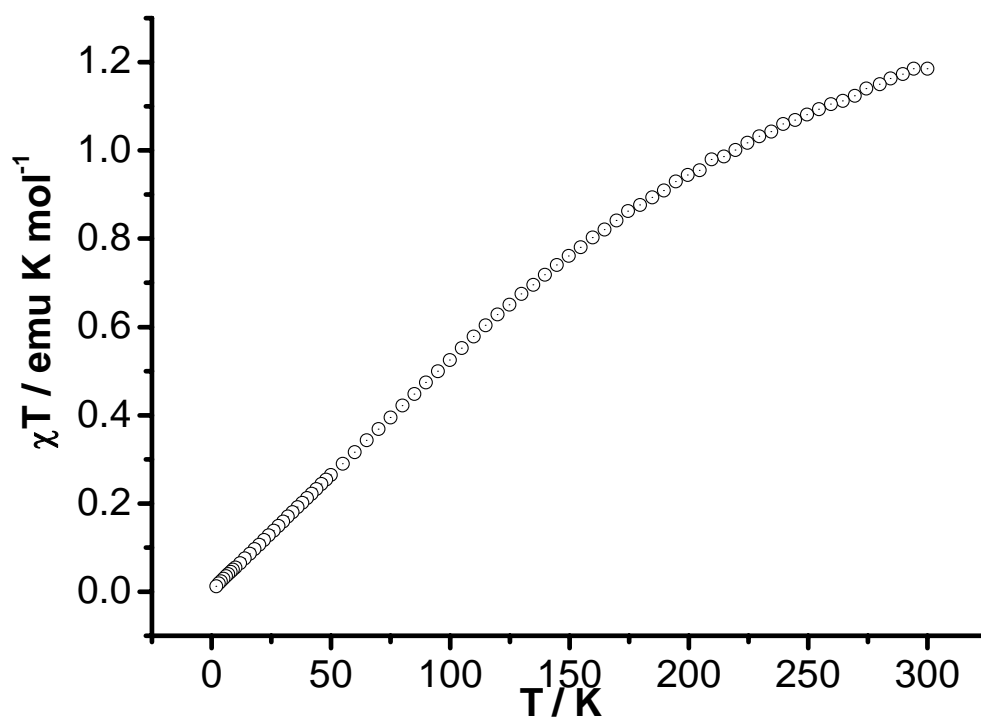

Fig. S4. Temperature dependence of the  $\chi_m T$  product for complex **3**
